# Supplementary material for: Transcriptome and Physiological Analysis of Rapeseed Tolerance to Post-flowering Temperature Increase
Source: Preprints.org preprint supplement (doi:10.20944/preprints202309.0164.v1), 2023-09-05
Supplement: Supplementary file 1 [file supplementary]

## Sheet: firebrick
source	term_name	term_id	highlighted	adjusted_p_value	negative_log10_of_adjusted_p_value	term_size	query_size	intersection_size	effective_domain_size	intersections
GO:BP	protein folding	GO:0006457	true	1.36557e-07	6.86469	598	1242	47	46510	CDX72741,CDX73815,CDX76768,CDX82537,CDX86004,CDX86330,CDX87226,CDX89453,CDX92876,CDX96324,CDX97342,CDX97490,CDY06551,CDY08725,CDY11430,CDY11583,CDY12100,CDY12232,CDY14359,CDY15103,CDY20742,CDY26423,CDY27339,CDY29868,CDY29908,CDY30514,CDY31144,CDY31804,CDY32855,CDY33094,CDY35063,CDY36809,CDY39426,CDY45448,CDY50531,CDY52281,CDY52661,CDY53371,CDY58005,CDY61479,CDY62693,CDY64790,CDY65077,CDY65546,CDY…
GO:BP	catabolic process	GO:0009056	true	2.00078e-07	6.6988	3766	1242	165	46510	CDX67550,CDX67566,CDX70158,CDX70836,CDX73567,CDX73837,CDX74076,CDX74715,CDX75302,CDX77799,CDX82019,CDX82840,CDX83925,CDX84432,CDX85798,CDX86104,CDX86742,CDX87650,CDX88295,CDX91795,CDX92506,CDX92875,CDX93004,CDX93816,CDX95172,CDX95819,CDX98857,CDX98939,CDX99600,CDY00211,CDY00789,CDY00799,CDY01069,CDY02937,CDY05107,CDY05894,CDY08085,CDY08249,CDY10162,CDY10185,CDY10260,CDY10984,CDY11182,CDY11209,CDY…
GO:BP	protein import into peroxisome matrix	GO:0016558	true	0.000753047	3.12318	33	1242	8	46510	CDX84355,CDX90175,CDY07989,CDY11941,CDY28038,CDY33510,CDY37450,CDY50786
GO:BP	sulfate assimilation	GO:0000103	true	0.00120509	2.91898	51	1242	9	46510	CDX81460,CDX93145,CDX94723,CDY08724,CDY22334,CDY31612,CDY37220,CDY43776,CDY44194
GO:BP	protein complex oligomerization	GO:0051259	true	0.00120509	2.91898	28	1242	7	46510	CDY33094,CDY45448,CDY53092,CDY53371,CDY58952,CDY61479,CDY68135
GO:BP	hydrogen sulfide biosynthetic process	GO:0070814	true	0.00216707	2.66413	13	1242	5	46510	CDX81460,CDX93145,CDY08724,CDY31612,CDY37220
GO:BP	response to reactive oxygen species	GO:0000302	true	0.00217156	2.66323	102	1242	12	46510	CDX72417,CDY14523,CDY28708,CDY33094,CDY35405,CDY35956,CDY40633,CDY45448,CDY48441,CDY53371,CDY61479,CDY68135
GO:BP	trehalose catabolic process	GO:0005993	true	0.00217156	2.66323	3	1242	3	46510	CDY10984,CDY50439,CDY66675
GO:BP	DNA replication initiation	GO:0006270	true	0.00282766	2.54857	75	1242	10	46510	CDX89727,CDX93091,CDY02256,CDY10780,CDY12567,CDY12638,CDY32546,CDY33466,CDY50940,CDY68073
GO:BP	cellular response to chemical stress	GO:0062197	true	0.00459675	2.33755	115	1242	12	46510	CDX72417,CDY16444,CDY18844,CDY28708,CDY29955,CDY35405,CDY40633,CDY48441,CDY49634,CDY58342,CDY65235,CDY67000
GO:CC	MCM complex	GO:0042555	true	0.000498222	3.30258	23	938	7	36482	CDX89727,CDX93091,CDY02256,CDY12567,CDY33466,CDY50940,CDY68073
GO:MF	heat shock protein binding	GO:0031072	true	1.62796e-05	4.78836	113	1546	17	55705	CDX86330,CDX89453,CDX97342,CDY01097,CDY04790,CDY11430,CDY11583,CDY12232,CDY31804,CDY35063,CDY39426,CDY50531,CDY52661,CDY62693,CDY65546,CDY65617,CDY70083
GO:MF	ATP hydrolysis activity	GO:0016887	true	0.00015503	3.80958	945	1546	55	55705	CDX72049,CDX72050,CDX73074,CDX74838,CDX76768,CDX83917,CDX84888,CDX85823,CDX86004,CDX89698,CDX92394,CDX93578,CDX94764,CDX96198,CDX96531,CDX96779,CDX97738,CDY01840,CDY06551,CDY10198,CDY11249,CDY11318,CDY12232,CDY12567,CDY14359,CDY17687,CDY18253,CDY20474,CDY20693,CDY20742,CDY24950,CDY26423,CDY27294,CDY31804,CDY33510,CDY33607,CDY34893,CDY35063,CDY37046,CDY37450,CDY38038,CDY38102,CDY46827,CDY47876,CDY…
GO:MF	adenylylsulfate kinase activity	GO:0004020	true	0.000697025	3.15675	23	1546	7	55705	CDX81460,CDX93145,CDY08724,CDY22334,CDY31612,CDY37220,CDY44194
GO:MF	unfolded protein binding	GO:0051082	true	0.000823161	3.08452	336	1546	26	55705	CDX86004,CDX86330,CDX87226,CDX89453,CDX92876,CDX97490,CDY06551,CDY11430,CDY12232,CDY14359,CDY20742,CDY29868,CDY29908,CDY31144,CDY31804,CDY33094,CDY35063,CDY45448,CDY50531,CDY52661,CDY53371,CDY61479,CDY65077,CDY65546,CDY68135,CDY70083
GO:MF	oxidoreductase activity, acting on CH or CH2 groups	GO:0016725	true	0.004217	2.375	14	1546	5	55705	CDX76275,CDX77615,CDX90328,CDY39450,CDY53637

## Sheet: lightskyblue2
source	term_name	term_id	highlighted	adjusted_p_value	negative_log10_of_adjusted_p_value	term_size	query_size	intersection_size	effective_domain_size	intersections
GO:BP	ribonucleoprotein complex biogenesis	GO:0022613	true	1.21807e-63	62.9143	1142	3797	284	46510	CDX69468,CDX69863,CDX70571,CDX72169,CDX72396,CDX73962,CDX74846,CDX74975,CDX75832,CDX76081,CDX76792,CDX77020,CDX77482,CDX77493,CDX78583,CDX79356,CDX80102,CDX80121,CDX80891,CDX80989,CDX82285,CDX85117,CDX85320,CDX85453,CDX88256,CDX88939,CDX89154,CDX90796,CDX90844,CDX90881,CDX90901,CDX91326,CDX91982,CDX92274,CDX92365,CDX92450,CDX92730,CDX93335,CDX93955,CDX93958,CDX94433,CDX96758,CDX97424,CDX97630,CDX…
GO:BP	protein folding	GO:0006457	true	1.84222e-23	22.7347	598	3797	131	46510	CDX69100,CDX69342,CDX69371,CDX69477,CDX70940,CDX70950,CDX71155,CDX72175,CDX73850,CDX74120,CDX74202,CDX75468,CDX75733,CDX76646,CDX77147,CDX77258,CDX78508,CDX78670,CDX79518,CDX80340,CDX80982,CDX80983,CDX82264,CDX83528,CDX84697,CDX84809,CDX85349,CDX86294,CDX86955,CDX89303,CDX90397,CDX92212,CDX92385,CDX92620,CDX92943,CDX93002,CDX93519,CDX93538,CDX93769,CDX93909,CDX93994,CDX94835,CDX94993,CDY00229,CDY…
GO:BP	glycolytic process	GO:0006096	true	4.05418e-09	8.3921	211	3797	48	46510	CDX73040,CDX73593,CDX75031,CDX76094,CDX76095,CDX76243,CDX76918,CDX78134,CDX79684,CDX81114,CDX84555,CDX87375,CDX88409,CDX88580,CDX89329,CDX92969,CDX94878,CDX96611,CDY02131,CDY13756,CDY15202,CDY19645,CDY20672,CDY21098,CDY21135,CDY25342,CDY31064,CDY32445,CDY33161,CDY33343,CDY35080,CDY37348,CDY37473,CDY40400,CDY40829,CDY43401,CDY48733,CDY49358,CDY58286,CDY60911,CDY64430,CDY65216,CDY65842,CDY66652,CDY…
GO:BP	vesicle-mediated transport	GO:0016192	true	8.15386e-06	5.08864	1428	3797	172	46510	CDX67799,CDX67937,CDX67974,CDX68831,CDX69412,CDX69781,CDX70177,CDX70396,CDX70472,CDX72832,CDX73438,CDX73490,CDX74953,CDX75004,CDX75054,CDX75151,CDX76153,CDX76193,CDX76198,CDX77428,CDX77680,CDX78274,CDX78796,CDX79587,CDX79739,CDX80083,CDX80813,CDX80972,CDX81699,CDX81745,CDX84139,CDX84702,CDX86574,CDX86788,CDX87316,CDX87317,CDX88654,CDX89283,CDX89793,CDX90341,CDX90452,CDX93010,CDX94190,CDX94628,CDX…
GO:BP	purine ribonucleoside monophosphate metabolic process	GO:0009167	true	5.77693e-05	4.2383	75	3797	20	46510	CDX67620,CDX73417,CDX74900,CDX76521,CDX78855,CDX90088,CDX91439,CDX93354,CDY01541,CDY06087,CDY07507,CDY11808,CDY18398,CDY24709,CDY31661,CDY45356,CDY51436,CDY51624,CDY55639,CDY58772
GO:BP	purine-containing compound salvage	GO:0043101	true	0.000177005	3.75201	33	3797	12	46510	CDX70315,CDX72824,CDX74900,CDX80860,CDX90088,CDX91439,CDX98754,CDY11808,CDY18398,CDY29537,CDY58772,CDY63965
GO:BP	regulation of mRNA splicing, via spliceosome	GO:0048024	true	0.000703471	3.15275	32	3797	11	46510	CDX78214,CDY11960,CDY12057,CDY14446,CDY20680,CDY31072,CDY35989,CDY42731,CDY51960,CDY60757,CDY66744
GO:BP	peptidyl-amino acid modification	GO:0018193	true	0.00167926	2.77488	945	3797	111	46510	CDX68845,CDX69100,CDX70111,CDX70530,CDX71155,CDX72175,CDX72293,CDX74907,CDX75243,CDX75468,CDX78508,CDX80340,CDX80930,CDX82711,CDX85349,CDX86294,CDX86937,CDX92365,CDX93909,CDX93994,CDX98805,CDX99192,CDX99529,CDY00247,CDY05647,CDY05669,CDY08441,CDY08494,CDY08708,CDY08734,CDY09088,CDY09131,CDY09696,CDY09732,CDY10955,CDY11906,CDY12766,CDY13411,CDY13855,CDY13928,CDY14001,CDY14235,CDY15890,CDY16015,CDY…
GO:BP	response to endoplasmic reticulum stress	GO:0034976	true	0.00304156	2.5169	189	3797	31	46510	CDX78403,CDX84809,CDX85554,CDY07941,CDY08558,CDY13274,CDY13824,CDY16643,CDY18278,CDY20062,CDY23972,CDY29177,CDY31103,CDY32161,CDY34179,CDY37102,CDY38821,CDY41581,CDY42355,CDY42362,CDY46766,CDY48611,CDY52544,CDY53400,CDY53673,CDY56958,CDY58134,CDY65150,CDY66148,CDY67038,CDY70269
GO:BP	S-adenosylmethionine biosynthetic process	GO:0006556	true	0.00865078	2.06294	14	3797	6	46510	CDX75007,CDX75914,CDY37784,CDY48693,CDY63017,CDY72092
GO:BP	regulatory ncRNA 3'-end processing	GO:0043628	true	0.00889846	2.05069	43	3797	11	46510	CDY06454,CDY11368,CDY22130,CDY25279,CDY33839,CDY38547,CDY50671,CDY52006,CDY52366,CDY61388,CDY70752
GO:BP	cytidine to uridine editing	GO:0016554	true	0.00889846	2.05069	43	3797	11	46510	CDX72924,CDX75801,CDX84224,CDX97624,CDX97626,CDY20096,CDY20996,CDY31675,CDY50054,CDY57037,CDY65831
GO:BP	purine ribonucleoside catabolic process	GO:0046130	true	0.00939799	2.02696	6	3797	4	46510	CDY16641,CDY47309,CDY50423,CDY58805
GO:CC	ribonucleoprotein complex	GO:1990904	true	3.90017e-68	67.4089	2023	3222	432	36482	CDX67642,CDX67932,CDX68828,CDX69025,CDX69468,CDX70336,CDX70429,CDX70571,CDX70599,CDX72169,CDX72396,CDX73991,CDX74026,CDX74165,CDX74890,CDX74975,CDX75230,CDX75453,CDX75983,CDX76296,CDX76792,CDX77482,CDX78583,CDX79036,CDX79356,CDX79567,CDX79908,CDX80121,CDX80674,CDX80847,CDX80891,CDX81046,CDX81860,CDX82572,CDX82714,CDX83063,CDX83869,CDX84541,CDX84640,CDX84767,CDX85128,CDX85453,CDX85559,CDX86179,CDX…
GO:CC	chaperonin-containing T-complex	GO:0005832	true	1.14519e-06	5.94112	39	3222	16	36482	CDX70950,CDY08491,CDY09085,CDY11302,CDY16573,CDY18835,CDY21153,CDY24564,CDY26490,CDY36138,CDY42227,CDY43747,CDY49990,CDY53919,CDY54836,CDY72106
GO:CC	U1 snRNP	GO:0005685	true	0.000356957	3.44738	58	3222	16	36482	CDX85453,CDX90901,CDX93958,CDY08518,CDY13008,CDY15486,CDY23693,CDY31480,CDY31880,CDY38430,CDY39189,CDY49311,CDY55536,CDY57127,CDY63856,CDY65184
GO:CC	U5 snRNP	GO:0005682	true	0.00117511	2.92992	34	3222	11	36482	CDX93958,CDY08518,CDY13008,CDY15450,CDY23693,CDY31480,CDY31880,CDY37439,CDY49311,CDY55536,CDY65184
GO:CC	phosphopyruvate hydratase complex	GO:0000015	true	0.00158793	2.79917	11	3222	6	36482	CDX73040,CDX75031,CDX79684,CDX84555,CDY33161,CDY65842
GO:CC	U4 snRNP	GO:0005687	true	0.00778927	2.1085	25	3222	8	36482	CDY08518,CDY13008,CDY23693,CDY24519,CDY31480,CDY31880,CDY49311,CDY65184
GO:CC	proton-transporting V-type ATPase, V1 domain	GO:0033180	true	0.00825281	2.0834	31	3222	9	36482	CDX72455,CDX88489,CDX90929,CDY01384,CDY19421,CDY21070,CDY29363,CDY31899,CDY49280
GO:CC	Golgi-associated vesicle membrane	GO:0030660	true	0.00861927	2.06453	108	3222	20	36482	CDX70177,CDX75151,CDX90341,CDY04935,CDY07629,CDY07940,CDY08549,CDY13859,CDY20169,CDY25807,CDY30380,CDY36196,CDY41313,CDY42637,CDY44731,CDY45351,CDY46215,CDY59088,CDY61712,CDY67686
GO:CC	chloroplast envelope	GO:0009941	true	0.00993985	2.00262	216	3222	33	36482	CDX89987,CDX92086,CDX92087,CDX98810,CDY08145,CDY08479,CDY08505,CDY08548,CDY12390,CDY14092,CDY16912,CDY23498,CDY24333,CDY26956,CDY30448,CDY35799,CDY38437,CDY38448,CDY39988,CDY43022,CDY45661,CDY46791,CDY47555,CDY48243,CDY48553,CDY49426,CDY49648,CDY51152,CDY53969,CDY55220,CDY60752,CDY66908,CDY69607
GO:MF	RNA binding	GO:0003723	true	9.64971e-75	74.0155	3669	4363	618	55705	CDX67642,CDX67680,CDX67932,CDX68303,CDX68687,CDX69025,CDX69203,CDX69253,CDX69457,CDX69497,CDX69580,CDX69699,CDX70008,CDX70102,CDX70241,CDX70451,CDX70474,CDX70599,CDX70648,CDX71819,CDX72131,CDX72169,CDX72906,CDX73070,CDX73495,CDX74180,CDX74287,CDX74375,CDX74383,CDX74519,CDX74645,CDX74975,CDX74978,CDX75526,CDX75832,CDX75983,CDX76092,CDX76110,CDX76547,CDX76567,CDX76737,CDX76792,CDX77274,CDX77482,CDX…
GO:MF	structural molecule activity	GO:0005198	true	2.12337e-53	52.673	1822	4363	349	55705	CDX67572,CDX67642,CDX67802,CDX67804,CDX67937,CDX67959,CDX69073,CDX69263,CDX69267,CDX69318,CDX69362,CDX69468,CDX69503,CDX69733,CDX70008,CDX70336,CDX70419,CDX70599,CDX70600,CDX70890,CDX71019,CDX72906,CDX73042,CDX73050,CDX73072,CDX73198,CDX73497,CDX73989,CDX73991,CDX74140,CDX74165,CDX74318,CDX74377,CDX74703,CDX74946,CDX74951,CDX74975,CDX75065,CDX75066,CDX75067,CDX75453,CDX75869,CDX75983,CDX75988,CDX…
GO:MF	ATP-dependent protein folding chaperone	GO:0140662	true	7.97349e-21	20.0984	263	4363	75	55705	CDX69342,CDX69477,CDX70940,CDX70950,CDX73850,CDX74120,CDX74202,CDX75733,CDX76065,CDX77147,CDX77423,CDX78670,CDX79518,CDX82264,CDX83528,CDX84697,CDX84809,CDX90397,CDX90500,CDX92212,CDX92620,CDX93002,CDX93769,CDX94835,CDY02438,CDY03477,CDY03881,CDY04527,CDY08245,CDY08491,CDY09085,CDY10445,CDY10446,CDY10557,CDY11302,CDY11918,CDY11921,CDY11961,CDY11962,CDY11967,CDY15422,CDY16175,CDY16176,CDY16573,CDY…
GO:MF	guanyl ribonucleotide binding	GO:0032561	true	7.95336e-19	18.0994	925	4363	159	55705	CDX67441,CDX69104,CDX69369,CDX69567,CDX70362,CDX70395,CDX70890,CDX72252,CDX73198,CDX73286,CDX73607,CDX74066,CDX74672,CDX74705,CDX75370,CDX75535,CDX75849,CDX76198,CDX77257,CDX77994,CDX78122,CDX78373,CDX78895,CDX79924,CDX80083,CDX80224,CDX80390,CDX80639,CDX80871,CDX81166,CDX81790,CDX86612,CDX87890,CDX87930,CDX89795,CDX89987,CDX90241,CDX90468,CDX90912,CDX90955,CDX92086,CDX92087,CDX92277,CDX92501,CDX…
GO:MF	unfolded protein binding	GO:0051082	true	4.61565e-18	17.3358	336	4363	81	55705	CDX69342,CDX69371,CDX69477,CDX70950,CDX73850,CDX74120,CDX74202,CDX76646,CDX77258,CDX78670,CDX82264,CDX83528,CDX84809,CDX86955,CDX90397,CDX92212,CDX92385,CDX92620,CDX92943,CDX93519,CDX93538,CDX93769,CDX94993,CDY00229,CDY03477,CDY03881,CDY07893,CDY08433,CDY08491,CDY09085,CDY09831,CDY10445,CDY11302,CDY11921,CDY11961,CDY11962,CDY11967,CDY16175,CDY16176,CDY16573,CDY18835,CDY20236,CDY21153,CDY22132,CDY…
GO:MF	RNA helicase activity	GO:0003724	true	8.16208e-14	13.0882	210	4363	55	55705	CDX69935,CDX71948,CDX75473,CDX75974,CDX76225,CDX79187,CDX79974,CDX80096,CDX81759,CDX82336,CDX82505,CDX83337,CDX87315,CDX90733,CDX95397,CDX97528,CDX98301,CDY02178,CDY02459,CDY02469,CDY04952,CDY08220,CDY10607,CDY10634,CDY14112,CDY16735,CDY16789,CDY21063,CDY21554,CDY23886,CDY24505,CDY26131,CDY28363,CDY28671,CDY32586,CDY34116,CDY34979,CDY36514,CDY37408,CDY37498,CDY37796,CDY39079,CDY39973,CDY41308,CDY…
GO:MF	GTPase activity	GO:0003924	true	9.90723e-14	13.004	727	4363	122	55705	CDX67441,CDX69104,CDX69369,CDX69567,CDX70362,CDX73198,CDX73607,CDX74672,CDX74705,CDX75370,CDX75535,CDX75849,CDX76198,CDX77257,CDX77994,CDX78122,CDX78373,CDX78895,CDX80083,CDX80224,CDX80390,CDX80639,CDX80871,CDX81166,CDX81790,CDX87890,CDX90241,CDX90468,CDX90912,CDX90955,CDX92086,CDX92087,CDX92277,CDX93520,CDX93604,CDX94925,CDX97480,CDX99094,CDY00519,CDY03583,CDY03747,CDY04706,CDY06290,CDY06595,CDY…
GO:MF	ribonucleoprotein complex binding	GO:0043021	true	2.55168e-11	10.5932	192	4363	48	55705	CDX70571,CDX72396,CDX76081,CDX78583,CDX80982,CDX80983,CDX81860,CDX83869,CDX86945,CDX92200,CDX95784,CDX95937,CDX96736,CDY02951,CDY05976,CDY07477,CDY07610,CDY08525,CDY09558,CDY11124,CDY12460,CDY15201,CDY16172,CDY17231,CDY18497,CDY18863,CDY18945,CDY21720,CDY26186,CDY36262,CDY39255,CDY40242,CDY41201,CDY43177,CDY43687,CDY43728,CDY45779,CDY48325,CDY51715,CDY52228,CDY57577,CDY59893,CDY60074,CDY61863,CDY…
GO:MF	isomerase activity	GO:0016853	true	2.42611e-05	4.61509	716	4363	94	55705	CDX67584,CDX67680,CDX68845,CDX69100,CDX69580,CDX70050,CDX71155,CDX71726,CDX72175,CDX74766,CDX74962,CDX75243,CDX75468,CDX76094,CDX76095,CDX77512,CDX78508,CDX78581,CDX80340,CDX85104,CDX85349,CDX86211,CDX86294,CDX88409,CDX89421,CDX92179,CDX92695,CDX93093,CDX93478,CDX93909,CDX93994,CDX94456,CDX95664,CDX95665,CDX95726,CDX96575,CDX99192,CDX99223,CDY00690,CDY00829,CDY05669,CDY07580,CDY08615,CDY08708,CDY…
GO:MF	peptide binding	GO:0042277	true	3.95556e-05	4.40279	147	4363	30	55705	CDX68119,CDX69263,CDX73194,CDX80340,CDX86945,CDY09716,CDY16472,CDY17231,CDY17501,CDY19045,CDY23498,CDY24333,CDY27248,CDY30427,CDY31102,CDY31391,CDY32165,CDY35854,CDY38439,CDY43687,CDY44668,CDY47469,CDY48325,CDY49426,CDY52228,CDY52993,CDY53085,CDY53714,CDY54431,CDY69452
GO:MF	heat shock protein binding	GO:0031072	true	0.000579218	3.23716	113	4363	23	55705	CDX69371,CDX76646,CDX80982,CDX80983,CDX84809,CDX89935,CDX90937,CDX92385,CDY08525,CDY10445,CDY15271,CDY15489,CDY16175,CDY16176,CDY23972,CDY35761,CDY46766,CDY46916,CDY46930,CDY49682,CDY53147,CDY63891,CDY71439
GO:MF	tRNA (guanine-N2-)-methyltransferase activity	GO:0004809	true	0.000580291	3.23635	13	4363	7	55705	CDX69497,CDX78654,CDY26464,CDY34719,CDY48991,CDY52167,CDY52168
GO:MF	nuclear import signal receptor activity	GO:0061608	true	0.00059052	3.22877	44	4363	13	55705	CDX93514,CDX94988,CDY04878,CDY09716,CDY19045,CDY31102,CDY31391,CDY32165,CDY35854,CDY44668,CDY52993,CDY53085,CDY54431
GO:MF	arginine N-methyltransferase activity	GO:0016273	true	0.000672025	3.17261	51	4363	14	55705	CDX72293,CDX82711,CDY05647,CDY08441,CDY08744,CDY13411,CDY23277,CDY33934,CDY35877,CDY47762,CDY51773,CDY51982,CDY66138,CDY71039
GO:MF	nucleobase-containing compound kinase activity	GO:0019205	true	0.000891929	3.04967	117	4363	23	55705	CDX70315,CDX74321,CDX79727,CDX80860,CDX84395,CDX88754,CDX88952,CDX89427,CDX92260,CDX99327,CDY02203,CDY13081,CDY16727,CDY24709,CDY31552,CDY33039,CDY41513,CDY44634,CDY46767,CDY52697,CDY65143,CDY67705,CDY71669
GO:MF	ferroxidase activity	GO:0004322	true	0.00090906	3.04141	10	4363	6	55705	CDX80762,CDX90894,CDY11190,CDY22113,CDY27246,CDY31995
GO:MF	protein heterodimerization activity	GO:0046982	true	0.00112603	2.94845	264	4363	40	55705	CDX69362,CDX71019,CDX73560,CDX74951,CDX75423,CDX76195,CDX78194,CDX80136,CDX81171,CDX88729,CDX95760,CDY02479,CDY04497,CDY04583,CDY06280,CDY06291,CDY07691,CDY11492,CDY12740,CDY15437,CDY15777,CDY21852,CDY22719,CDY26245,CDY26964,CDY28916,CDY31104,CDY31584,CDY31726,CDY32137,CDY32809,CDY44919,CDY47568,CDY49410,CDY50522,CDY53021,CDY53617,CDY56098,CDY57201,CDY60164
GO:MF	phosphopyruvate hydratase activity	GO:0004634	true	0.00174813	2.75743	11	4363	6	55705	CDX73040,CDX75031,CDX79684,CDX84555,CDY33161,CDY65842
GO:MF	misfolded protein binding	GO:0051787	true	0.0019321	2.71397	37	4363	11	55705	CDX84809,CDY10445,CDY16175,CDY16176,CDY16643,CDY23972,CDY42355,CDY46766,CDY48611,CDY49682,CDY53147
GO:MF	nucleotide-sugar transmembrane transporter activity	GO:0005338	true	0.00333335	2.47712	81	4363	17	55705	CDX72534,CDX88866,CDX90737,CDX92485,CDY06010,CDY08830,CDY15303,CDY18688,CDY24809,CDY33666,CDY33752,CDY42322,CDY49878,CDY52304,CDY54885,CDY57189,CDY57491
GO:MF	phosphoribosylformylglycinamidine cyclo-ligase activity	GO:0004641	true	0.00373764	2.4274	5	4363	4	55705	CDX67620,CDX73417,CDY07507,CDY51436
GO:MF	iron-sulfur cluster binding	GO:0051536	true	0.00395043	2.40336	387	4363	51	55705	CDX68142,CDX69221,CDX70421,CDX70815,CDX72872,CDX74403,CDX74846,CDX75034,CDX76383,CDX76477,CDX78521,CDX79828,CDX81109,CDX82285,CDX90891,CDX96375,CDY00681,CDY13855,CDY14291,CDY14473,CDY16491,CDY18059,CDY18699,CDY20141,CDY22113,CDY22839,CDY24597,CDY24823,CDY25352,CDY27446,CDY29779,CDY30094,CDY30147,CDY32243,CDY34039,CDY35934,CDY37748,CDY40039,CDY40441,CDY43018,CDY44575,CDY44868,CDY45416,CDY45563,CDY…
GO:MF	tRNA dihydrouridine synthase activity	GO:0017150	true	0.00469049	2.32878	13	4363	6	55705	CDX81328,CDY08156,CDY08157,CDY18644,CDY41950,CDY42592
GO:MF	S-acyltransferase activity	GO:0016417	true	0.00476625	2.32182	116	4363	21	55705	CDX74374,CDX82504,CDX92467,CDX95936,CDX97529,CDX98764,CDY02042,CDY10718,CDY13593,CDY22939,CDY24058,CDY24843,CDY27810,CDY29690,CDY34297,CDY41385,CDY51805,CDY52347,CDY68411,CDY69715,CDY71422
GO:MF	protein disulfide isomerase activity	GO:0003756	true	0.00537155	2.2699	42	4363	11	55705	CDX95726,CDX96575,CDY18278,CDY33723,CDY37102,CDY38821,CDY40389,CDY52544,CDY53400,CDY56958,CDY57723
GO:MF	methionine adenosyltransferase activity	GO:0004478	true	0.00719085	2.14322	14	4363	6	55705	CDX75007,CDX75914,CDY37784,CDY48693,CDY63017,CDY72092
GO:MF	ferric iron binding	GO:0008199	true	0.00793931	2.10022	25	4363	8	55705	CDX67631,CDX72174,CDX80762,CDX90894,CDY11190,CDY22113,CDY27246,CDY31995
GO:MF	(S)-2-(5-amino-1-(5-phospho-D-ribosyl)imidazole-4-carboxamido) succinate lyase (fumarate-forming) activity	GO:0070626	true	0.00841099	2.07515	6	4363	4	55705	CDX76521,CDX78855,CDY01541,CDY55639
GO:MF	5'-3' DNA helicase activity	GO:0043139	true	0.00841099	2.07515	6	4363	4	55705	CDY09550,CDY29862,CDY37642,CDY65466

## Sheet: lightblue3
source	term_name	term_id	highlighted	adjusted_p_value	negative_log10_of_adjusted_p_value	term_size	query_size	intersection_size	effective_domain_size	intersections
GO:BP	small molecule metabolic process	GO:0044281	true	9.0826e-32	31.0418	3969	3122	469	46510	CDX67476,CDX67554,CDX67722,CDX68896,CDX69004,CDX69133,CDX69483,CDX69643,CDX69928,CDX69938,CDX70190,CDX71855,CDX71971,CDX72011,CDX72132,CDX72339,CDX72456,CDX73218,CDX73909,CDX74106,CDX74185,CDX74199,CDX74242,CDX74465,CDX75228,CDX75291,CDX75497,CDX75740,CDX76145,CDX77369,CDX78223,CDX78350,CDX78351,CDX78450,CDX78688,CDX78967,CDX78986,CDX79065,CDX79416,CDX79594,CDX79790,CDX79804,CDX80443,CDX80561,CDX…
GO:BP	photosynthesis	GO:0015979	true	1.66951e-19	18.7774	451	3122	93	46510	CDX68011,CDX72094,CDX74532,CDX74808,CDX77552,CDX79052,CDX80711,CDX81388,CDX84479,CDX86515,CDX87545,CDX88339,CDX93077,CDX97724,CDX98158,CDX99044,CDX99465,CDY00149,CDY01542,CDY01844,CDY02288,CDY02376,CDY03510,CDY03835,CDY04834,CDY05098,CDY05165,CDY06657,CDY08255,CDY09592,CDY10216,CDY10544,CDY10747,CDY12429,CDY12516,CDY15020,CDY15587,CDY17247,CDY17951,CDY18055,CDY18175,CDY18611,CDY18726,CDY20182,CDY…
GO:BP	vesicle-mediated transport	GO:0016192	true	5.21432e-06	5.2828	1428	3122	148	46510	CDX68365,CDX68639,CDX68871,CDX68888,CDX69137,CDX69684,CDX70725,CDX70999,CDX71272,CDX72119,CDX73855,CDX74812,CDX76700,CDX78717,CDX80773,CDX81739,CDX81991,CDX86132,CDX86533,CDX87655,CDX88036,CDX88799,CDX93553,CDX93845,CDX94488,CDX95050,CDX95144,CDX95277,CDX96696,CDX97497,CDX98625,CDY00099,CDY00997,CDY01197,CDY01478,CDY03204,CDY03335,CDY03540,CDY06150,CDY06504,CDY07049,CDY07551,CDY07577,CDY07756,CDY…
GO:BP	endoplasmic reticulum localization	GO:0051643	true	0.000137466	3.8618	21	3122	9	46510	CDY25982,CDY28793,CDY31124,CDY40565,CDY41153,CDY44751,CDY47093,CDY48365,CDY56247
GO:BP	cellular component assembly	GO:0022607	true	0.000227346	3.64331	1664	3122	158	46510	CDX69139,CDX70275,CDX70280,CDX72053,CDX72593,CDX73224,CDX75502,CDX77204,CDX78396,CDX78588,CDX79137,CDX79491,CDX79740,CDX79927,CDX81306,CDX81388,CDX82078,CDX82935,CDX84793,CDX84810,CDX84823,CDX85788,CDX86050,CDX86301,CDX87193,CDX87617,CDX87645,CDX88064,CDX89383,CDX93960,CDX94401,CDX94548,CDX94573,CDX96171,CDX97915,CDX98531,CDY00080,CDY00664,CDY01014,CDY01016,CDY01024,CDY01071,CDY03344,CDY05141,CDY…
GO:BP	endoplasmic reticulum membrane organization	GO:0090158	true	0.000706491	3.15089	26	3122	9	46510	CDY25982,CDY28793,CDY31124,CDY40565,CDY41153,CDY44751,CDY47093,CDY48365,CDY56247
GO:BP	ubiquitin-dependent protein catabolic process	GO:0006511	true	0.00110991	2.95471	1073	3122	106	46510	CDX67865,CDX68003,CDX68112,CDX68773,CDX68888,CDX69526,CDX70725,CDX73212,CDX75682,CDX78717,CDX82013,CDX86533,CDX87167,CDX88517,CDX88684,CDX89132,CDX98449,CDX99604,CDY01006,CDY01756,CDY03235,CDY03475,CDY04674,CDY08368,CDY08956,CDY11036,CDY11340,CDY12810,CDY14495,CDY16857,CDY17396,CDY17851,CDY19199,CDY19309,CDY20922,CDY21295,CDY21754,CDY21896,CDY21934,CDY21970,CDY25375,CDY25967,CDY26332,CDY26683,CDY…
GO:BP	oxaloacetate metabolic process	GO:0006107	true	0.00725224	2.13953	11	3122	5	46510	CDY32711,CDY32953,CDY32993,CDY43863,CDY58562
GO:BP	organelle organization	GO:0006996	true	0.00892732	2.04928	2767	3122	229	46510	CDX67789,CDX70280,CDX71989,CDX73224,CDX73912,CDX74040,CDX75477,CDX78382,CDX78396,CDX78875,CDX79451,CDX79491,CDX82078,CDX83962,CDX84810,CDX85548,CDX86152,CDX86284,CDX86301,CDX86402,CDX86762,CDX87163,CDX87645,CDX88023,CDX88731,CDX89155,CDX91460,CDX92925,CDX93687,CDX93960,CDX94329,CDX94538,CDX97365,CDX99799,CDX99980,CDY00047,CDY00080,CDY00161,CDY00283,CDY00520,CDY01014,CDY01071,CDY01118,CDY01197,CDY…
GO:BP	DNA replication-dependent chromatin assembly	GO:0006335	true	0.00944278	2.0249	7	3122	4	46510	CDX84536,CDY12587,CDY50605,CDY51288
GO:CC	cytoplasm	GO:0005737	true	6.45384e-32	31.1902	13425	2599	1251	36482	CDX67722,CDX67789,CDX67837,CDX67865,CDX67965,CDX68036,CDX68871,CDX69004,CDX69137,CDX69205,CDX69483,CDX69643,CDX69684,CDX69735,CDX69894,CDX69928,CDX70000,CDX70190,CDX70280,CDX70303,CDX70780,CDX70812,CDX70852,CDX71272,CDX71855,CDX71971,CDX72053,CDX72132,CDX72255,CDX73242,CDX73508,CDX73829,CDX74040,CDX74129,CDX74532,CDX74799,CDX74812,CDX75248,CDX75259,CDX75407,CDX75495,CDX75654,CDX75740,CDX76615,CDX…
GO:CC	extrinsic component of membrane	GO:0019898	true	0.000811724	3.09059	118	2599	21	36482	CDX79052,CDX86515,CDX87545,CDX88339,CDY04098,CDY05165,CDY06657,CDY10216,CDY11494,CDY11875,CDY15587,CDY17455,CDY37521,CDY39157,CDY39210,CDY45708,CDY47220,CDY48804,CDY53049,CDY55891,CDY69242
GO:CC	clathrin adaptor complex	GO:0030131	true	0.00316577	2.49952	47	2599	11	36482	CDX69137,CDX95277,CDY03204,CDY08937,CDY19316,CDY20344,CDY46183,CDY54239,CDY63050,CDY63352,CDY69066
GO:CC	nuclear body	GO:0016604	true	0.00833423	2.07913	61	2599	12	36482	CDY11223,CDY12869,CDY34624,CDY40481,CDY41541,CDY44717,CDY45585,CDY47646,CDY50385,CDY55773,CDY66742,CDY68847
GO:MF	oxidoreductase activity, acting on the CH-OH group of donors, NAD or NADP as acceptor	GO:0016616	true	2.62525e-07	6.58083	526	3702	76	55705	CDX67476,CDX67931,CDX71758,CDX74106,CDX78432,CDX81204,CDX81403,CDX81448,CDX82012,CDX84457,CDX88544,CDX88669,CDX89514,CDX94738,CDX96459,CDX97647,CDX98542,CDY00159,CDY00327,CDY07209,CDY07292,CDY10276,CDY10391,CDY11246,CDY11496,CDY13439,CDY14368,CDY15588,CDY15726,CDY15732,CDY16428,CDY18853,CDY19184,CDY20053,CDY22323,CDY23722,CDY25313,CDY25568,CDY25631,CDY27412,CDY30914,CDY32381,CDY32711,CDY32953,CDY…
GO:MF	iron-sulfur cluster binding	GO:0051536	true	2.82868e-05	4.54842	387	3702	55	55705	CDX67470,CDX68864,CDX69732,CDX70275,CDX73918,CDX74580,CDX78444,CDX79137,CDX81984,CDX83228,CDX83485,CDX89383,CDX89405,CDX92421,CDX94401,CDX97144,CDX97925,CDY01130,CDY07430,CDY07516,CDY07744,CDY09694,CDY11704,CDY12877,CDY17295,CDY17951,CDY17953,CDY20627,CDY21322,CDY21755,CDY21897,CDY21952,CDY22118,CDY23941,CDY26782,CDY28047,CDY30545,CDY32244,CDY41238,CDY41845,CDY42796,CDY43774,CDY44833,CDY46350,CDY…
GO:MF	NAD binding	GO:0051287	true	5.74083e-05	4.24103	242	3702	39	55705	CDX67931,CDX74199,CDX78432,CDX81204,CDX81448,CDX83635,CDX84457,CDX88693,CDX92059,CDX95579,CDX97647,CDX98028,CDX98100,CDX98542,CDY07209,CDY10391,CDY11246,CDY13649,CDY15732,CDY16090,CDY16428,CDY19201,CDY25954,CDY26599,CDY27412,CDY28536,CDY35240,CDY35955,CDY36763,CDY37603,CDY38678,CDY41845,CDY42906,CDY44353,CDY45372,CDY48667,CDY49888,CDY53311,CDY64674
GO:MF	hydrolase activity, acting on carbon-nitrogen (but not peptide) bonds	GO:0016810	true	0.000161307	3.79235	292	3702	43	55705	CDX72456,CDX74918,CDX75139,CDX75663,CDX75664,CDX76070,CDX78463,CDX79147,CDX79760,CDX81220,CDX94584,CDX97163,CDX98655,CDX98745,CDY02963,CDY09130,CDY12274,CDY14997,CDY17851,CDY21508,CDY22342,CDY24055,CDY30209,CDY35400,CDY35679,CDY36763,CDY37692,CDY42142,CDY42210,CDY42956,CDY44735,CDY45801,CDY48127,CDY54276,CDY54793,CDY55886,CDY55887,CDY59101,CDY59872,CDY62178,CDY65424,CDY71162,CDY72048
GO:MF	vitamin binding	GO:0019842	true	0.000230118	3.63805	431	3702	56	55705	CDX72339,CDX74110,CDX81186,CDX81416,CDX81982,CDX82203,CDX82847,CDX85201,CDX85266,CDX86887,CDX91604,CDX91962,CDX95238,CDX96644,CDX96776,CDY00131,CDY00902,CDY03310,CDY03384,CDY04729,CDY05250,CDY08058,CDY10495,CDY10891,CDY11756,CDY13078,CDY13467,CDY17293,CDY19880,CDY21752,CDY22213,CDY23632,CDY24704,CDY29088,CDY29255,CDY29362,CDY30381,CDY31227,CDY37543,CDY38550,CDY39390,CDY41319,CDY41519,CDY41644,CDY…
GO:MF	NADP binding	GO:0050661	true	0.000625094	3.20405	193	3702	31	55705	CDX67476,CDX74106,CDX74199,CDX92059,CDX95582,CDX98028,CDY00159,CDY00327,CDY15726,CDY16090,CDY18853,CDY19201,CDY20053,CDY25568,CDY26599,CDY27412,CDY28169,CDY29147,CDY31816,CDY34405,CDY34406,CDY39900,CDY42906,CDY45372,CDY49888,CDY56743,CDY57527,CDY68139,CDY72063,CDY72206,CDY72674
GO:MF	cysteine synthase activity	GO:0004124	true	0.000846803	3.07222	28	3702	10	55705	CDX79804,CDX89032,CDX89116,CDY09039,CDY23400,CDY41911,CDY45790,CDY48919,CDY68436,CDY68838
GO:MF	ubiquitin conjugating enzyme activity	GO:0061631	true	0.00199947	2.69909	114	3702	21	55705	CDY08368,CDY14587,CDY17396,CDY21754,CDY23617,CDY25375,CDY32651,CDY34409,CDY34987,CDY37084,CDY39315,CDY40025,CDY43593,CDY45199,CDY47522,CDY48483,CDY49174,CDY51965,CDY52132,CDY54372,CDY65714
GO:MF	nucleobase-containing compound kinase activity	GO:0019205	true	0.00280303	2.55237	117	3702	21	55705	CDX74861,CDX80174,CDX80561,CDX83666,CDX85310,CDX86826,CDX87049,CDY05244,CDY18459,CDY19972,CDY28487,CDY28618,CDY36391,CDY40669,CDY42388,CDY48138,CDY48140,CDY58453,CDY61716,CDY63236,CDY66273
GO:MF	dihydrolipoyllysine-residue succinyltransferase activity	GO:0004149	true	0.00416912	2.37996	8	3702	5	55705	CDY12012,CDY19918,CDY21016,CDY31217,CDY36727
GO:MF	intramolecular oxidoreductase activity, transposing C=C bonds	GO:0016863	true	0.00462452	2.33493	29	3702	9	55705	CDX74236,CDX92012,CDY12468,CDY35240,CDY38233,CDY43419,CDY47152,CDY51536,CDY67294
GO:MF	protein heterodimerization activity	GO:0046982	true	0.00479215	2.31947	264	3702	35	55705	CDX70375,CDX73471,CDX73535,CDX77199,CDX77204,CDX78406,CDX79740,CDX81280,CDX84419,CDX84890,CDX86050,CDX86146,CDX87185,CDX93525,CDX95175,CDX99975,CDY05567,CDY05857,CDY12758,CDY13221,CDY13222,CDY15530,CDY18434,CDY21749,CDY21851,CDY25955,CDY31119,CDY31123,CDY48146,CDY54540,CDY61820,CDY62197,CDY66668,CDY68289,CDY72471
GO:MF	histone binding	GO:0042393	true	0.00489512	2.31024	154	3702	24	55705	CDX75704,CDX79127,CDX81645,CDX87061,CDY01002,CDY05535,CDY12119,CDY12587,CDY17436,CDY21596,CDY25622,CDY26787,CDY36322,CDY41517,CDY43875,CDY47479,CDY50605,CDY52429,CDY56588,CDY58569,CDY65375,CDY65997,CDY68599,CDY69405
GO:MF	phosphoribulokinase activity	GO:0008974	true	0.00512963	2.28991	5	3702	4	55705	CDY22582,CDY35538,CDY41745,CDY59208
GO:MF	ubiquitin-like protein binding	GO:0032182	true	0.00592128	2.22758	186	3702	27	55705	CDX67941,CDX68888,CDX70725,CDX78717,CDX86533,CDX87082,CDX94671,CDY08405,CDY11029,CDY21295,CDY41088,CDY41526,CDY41932,CDY43412,CDY47069,CDY47418,CDY48340,CDY52848,CDY52869,CDY58121,CDY61061,CDY61534,CDY62935,CDY65111,CDY66129,CDY69105,CDY72330
GO:MF	protein-macromolecule adaptor activity	GO:0030674	true	0.00743813	2.12854	199	3702	28	55705	CDX69137,CDX82368,CDX88551,CDX93553,CDX93845,CDX95050,CDY00099,CDY01478,CDY02165,CDY15661,CDY18500,CDY20344,CDY20568,CDY20627,CDY23942,CDY33349,CDY33461,CDY41311,CDY52786,CDY52847,CDY52861,CDY59046,CDY60786,CDY62698,CDY63352,CDY66384,CDY68585,CDY69066
GO:MF	endoplasmic reticulum signal peptide binding	GO:0030942	true	0.00987833	2.00532	20	3702	7	55705	CDX79810,CDX83471,CDX93702,CDY00241,CDY12964,CDY30425,CDY40616
