# Supplementary material for: Transcriptome and Physiological Analysis of Rapeseed Tolerance to Post-flowering Temperature Increase
Source: Preprints.org preprint supplement (doi:10.20944/preprints202309.0164.v1), 2023-09-05
Supplement: Supplementary file 2 [file Table S1.xlsx]

## Sheet: Sheet1
sample	tissue	genotypè	days after flowering	treatment	season	replicate	reads_processed	reads_pseudoaligned	%_pseudoaligned
LCG151	Seed	Lumen	7DAF	Control	S2019	1	21732241	15469780	71.2
LCG159	Seed	Lumen	7DAF	Control	S2019	2	25340635	17538769	69.2
LCG167	Seed	Lumen	7DAF	Control	S2019	3	20981827	14972500	71.4
LCG175	Seed	Lumen	14DAF	Control	S2019	1	22810472	16943391	74.3
LCG183	Seed	Lumen	14DAF	Control	S2019	2	22628198	16802099	74.3
LCG191	Seed	Lumen	14DAF	Control	S2019	3	21589197	16067342	74.4
LCG339	Seed	Lumen	7DAF	Control	S2020	1	22594536	16993303	75.2
LCG343B	Seed	Lumen	7DAF	Control	S2020	2	22367724	16724103	74.8
LCG347	Seed	Lumen	7DAF	Control	S2020	3	19580400	14780426	75.5
LCG351	Seed	Lumen	7DAF	Control	S2020	4	22240113	16674435	75
LCG355	Seed	Lumen	14DAF	Control	S2020	1	22352819	17085424	76.4
LCG359	Seed	Lumen	14DAF	Control	S2020	2	23791490	17907264	75.3
LCG363	Seed	Lumen	14DAF	Control	S2020	3	23547074	17957773	76.3
LCG367	Seed	Lumen	14DAF	Control	S2020	4	21885955	16650718	76.1
LCS152	Silique	Lumen	7DAF	Control	S2019	1	21659399	15836393	73.1
LCS160	Silique	Lumen	7DAF	Control	S2019	2	22254261	16222882	72.9
LCS168	Silique	Lumen	7DAF	Control	S2019	3	24021782	17484716	72.8
LCS176	Silique	Lumen	14DAF	Control	S2019	1	20298496	15013899	74
LCS184	Silique	Lumen	14DAF	Control	S2019	2	21660091	15861652	73.2
LCS192	Silique	Lumen	14DAF	Control	S2019	3	22087883	15092238	68.3
LCS340	Silique	Lumen	7DAF	Control	S2020	1	22944783	17054917	74.3
LCS344	Silique	Lumen	7DAF	Control	S2020	2	23118532	17285042	74.8
LCS348	Silique	Lumen	7DAF	Control	S2020	3	23562250	17493487	74.2
LCS352	Silique	Lumen	7DAF	Control	S2020	4	23223643	17273849	74.4
LCS356	Silique	Lumen	14DAF	Control	S2020	1	22078555	15918949	72.1
LCS360	Silique	Lumen	14DAF	Control	S2020	2	20650266	15438705	74.8
LCS364	Silique	Lumen	14DAF	Control	S2020	3	25349557	18505976	73
LCS368	Silique	Lumen	14DAF	Control	S2020	4	22818308	17344875	76
LHG337	Seed	Lumen	7DAF	Heat	S2020	1	22948398	16748426	73
LHG341	Seed	Lumen	7DAF	Heat	S2020	2	22446680	16854765	75.1
LHG345	Seed	Lumen	7DAF	Heat	S2020	3	23791764	17972110	75.5
LHG349	Seed	Lumen	7DAF	Heat	S2020	4	21261324	13592382	63.9
LHG353	Seed	Lumen	14DAF	Heat	S2020	1	23096778	17306905	74.9
LHG357	Seed	Lumen	14DAF	Heat	S2020	2	19615053	14550875	74.2
LHG361	Seed	Lumen	14DAF	Heat	S2020	3	22137917	16533556	74.7
LHG365	Seed	Lumen	14DAF	Heat	S2020	4	22848212	17153915	75.1
LHS338	Silique	Lumen	7DAF	Heat	S2020	1	22737789	16672408	73.3
LHS342	Silique	Lumen	7DAF	Heat	S2020	2	22396660	16818360	75.1
LHS346	Silique	Lumen	7DAF	Heat	S2020	3	22796881	17103324	75
LHS350	Silique	Lumen	7DAF	Heat	S2020	4	22474221	16647655	74.1
LHS354	Silique	Lumen	14DAF	Heat	S2020	1	23099461	17311950	74.9
LHS358	Silique	Lumen	14DAF	Heat	S2020	2	21333866	15880108	74.4
LHS362	Silique	Lumen	14DAF	Heat	S2020	3	22646909	17093776	75.5
LHS366	Silique	Lumen	14DAF	Heat	S2020	4	20403654	15301613	75
LTG149	Seed	Lumen	7DAF	Heat	S2019	1	25448291	18927450	74.4
LTG157	Seed	Lumen	7DAF	Heat	S2019	2	22885715	16678295	72.9
LTG165	Seed	Lumen	7DAF	Heat	S2019	3	21714183	16065594	74
LTG173	Seed	Lumen	14DAF	Heat	S2019	1	22752784	16869233	74.1
LTG181	Seed	Lumen	14DAF	Heat	S2019	2	21280261	15710517	73.8
LTG189	Seed	Lumen	14DAF	Heat	S2019	3	22606184	16802569	74.3
LTS150	Silique	Lumen	7DAF	Heat	S2019	1	20788400	15336418	73.8
LTS158	Silique	Lumen	7DAF	Heat	S2019	2	22901953	16744810	73.1
LTS166	Silique	Lumen	7DAF	Heat	S2019	3	19694359	14221150	72.2
LTS174	Silique	Lumen	14DAF	Heat	S2019	1	20257882	14700743	72.6
LTS182	Silique	Lumen	14DAF	Heat	S2019	2	21212651	15455573	72.9
LTS190	Silique	Lumen	14DAF	Heat	S2019	3	21394521	15618097	73
SCG199	Seed	Solar	7DAF	Control	S2019	1	21686310	15860397	73.1
SCG207B	Seed	Solar	7DAF	Control	S2019	2	24130972	18245319	75.6
SCG215	Seed	Solar	7DAF	Control	S2019	3	21912837	15719793	71.7
SCG223	Seed	Solar	14DAF	Control	S2019	1	23117736	11161025	48.3
SCG231	Seed	Solar	14DAF	Control	S2019	2	22392226	16488240	73.6
SCG239	Seed	Solar	14DAF	Control	S2019	3	21352037	15783769	73.9
SCG371	Seed	Solar	7DAF	Control	S2020	1	22012273	16375280	74.4
SCG375	Seed	Solar	7DAF	Control	S2020	2	22386772	16650562	74.4
SCG379B	Seed	Solar	7DAF	Control	S2020	3	22851386	17058128	74.6
SCG383	Seed	Solar	7DAF	Control	S2020	4	23378988	17585906	75.2
SCG387	Seed	Solar	14DAF	Control	S2020	1	24480016	18392005	75.1
SCG391	Seed	Solar	14DAF	Control	S2020	2	22622208	16729309	74
SCG395	Seed	Solar	14DAF	Control	S2020	3	22466875	16949048	75.4
SCG399	Seed	Solar	14DAF	Control	S2020	4	21892697	16511079	75.4
SCS200	Silique	Solar	7DAF	Control	S2019	1	22084154	16191271	73.3
SCS208	Silique	Solar	7DAF	Control	S2019	2	21513956	15722768	73.1
SCS216B	Silique	Solar	7DAF	Control	S2019	3	23541212	17656426	75
SCS224	Silique	Solar	14DAF	Control	S2019	1	19987528	14778644	73.9
SCS232	Silique	Solar	14DAF	Control	S2019	2	21980884	15178813	69.1
SCS240	Silique	Solar	14DAF	Control	S2019	3	21265289	15540084	73.1
SCS372	Silique	Solar	7DAF	Control	S2020	1	20094310	14244127	70.9
SCS376	Silique	Solar	7DAF	Control	S2020	2	22515445	16797358	74.6
SCS380	Silique	Solar	7DAF	Control	S2020	3	22894059	17160592	75
SCS384	Silique	Solar	7DAF	Control	S2020	4	20440928	15155747	74.1
SCS388	Silique	Solar	14DAF	Control	S2020	1	22885917	16913950	73.9
SCS392	Silique	Solar	14DAF	Control	S2020	2	22570712	16867851	74.7
SCS396	Silique	Solar	14DAF	Control	S2020	3	21997471	16507742	75
SCS400	Silique	Solar	14DAF	Control	S2020	4	21923150	16182119	73.8
SHG369	Seed	Solar	7DAF	Heat	S2020	1	23513328	17958227	76.4
SHG373	Seed	Solar	7DAF	Heat	S2020	2	20349709	14929232	73.4
SHG377	Seed	Solar	7DAF	Heat	S2020	3	23000221	17161526	74.6
SHG381B	Seed	Solar	7DAF	Heat	S2020	4	23230452	17501258	75.3
SHG385	Seed	Solar	14DAF	Heat	S2020	1	21760150	16250507	74.7
SHG389	Seed	Solar	14DAF	Heat	S2020	2	22206501	16458994	74.1
SHG393	Seed	Solar	14DAF	Heat	S2020	3	23053895	17261955	74.9
SHG397	Seed	Solar	14DAF	Heat	S2020	4	22158830	16481123	74.4
SHS206B	Silique	Solar	7DAF	Heat	S2019	2	21274140	15929727	74.9
SHS370	Silique	Solar	7DAF	Heat	S2020	1	23850035	18042494	75.6
SHS374	Silique	Solar	7DAF	Heat	S2020	2	21876381	16407158	75
SHS378	Silique	Solar	7DAF	Heat	S2020	3	22223331	16411629	73.8
SHS382	Silique	Solar	7DAF	Heat	S2020	4	23344257	16642263	71.3
SHS386	Silique	Solar	14DAF	Heat	S2020	1	22961249	17275274	75.2
SHS390	Silique	Solar	14DAF	Heat	S2020	2	24644765	18211915	73.9
SHS394	Silique	Solar	14DAF	Heat	S2020	3	23261328	17535024	75.4
SHS398	Silique	Solar	14DAF	Heat	S2020	4	21983659	16263248	74
STG197	Seed	Solar	7DAF	Heat	S2019	1	21045519	15532669	73.8
STG205	Seed	Solar	7DAF	Heat	S2019	2	21036039	15362527	73
STG213	Seed	Solar	7DAF	Heat	S2019	3	21957652	16113760	73.4
STG221	Seed	Solar	14DAF	Heat	S2019	1	21838667	15966225	73.1
STG229	Seed	Solar	14DAF	Heat	S2019	2	22331670	16538155	74.1
STG237	Seed	Solar	14DAF	Heat	S2019	3	22145255	16348829	73.8
STS198	Silique	Solar	7DAF	Heat	S2019	1	22407336	16453839	73.4
STS214	Silique	Solar	7DAF	Heat	S2019	3	21513069	15527073	72.2
STS222	Silique	Solar	14DAF	Heat	S2019	1	20775420	15134404	72.8
STS230	Silique	Solar	14DAF	Heat	S2019	2	21555779	15819770	73.4
STS238	Silique	Solar	14DAF	Heat	S2019	3	21609960	15840750	73.3
