# Supplementary figures and images for: Transcriptome and Physiological Analysis of Rapeseed Tolerance to Post-flowering Temperature Increase
Source: Preprints.org preprint supplement (doi:10.20944/preprints202309.0164.v1), 2023-09-05

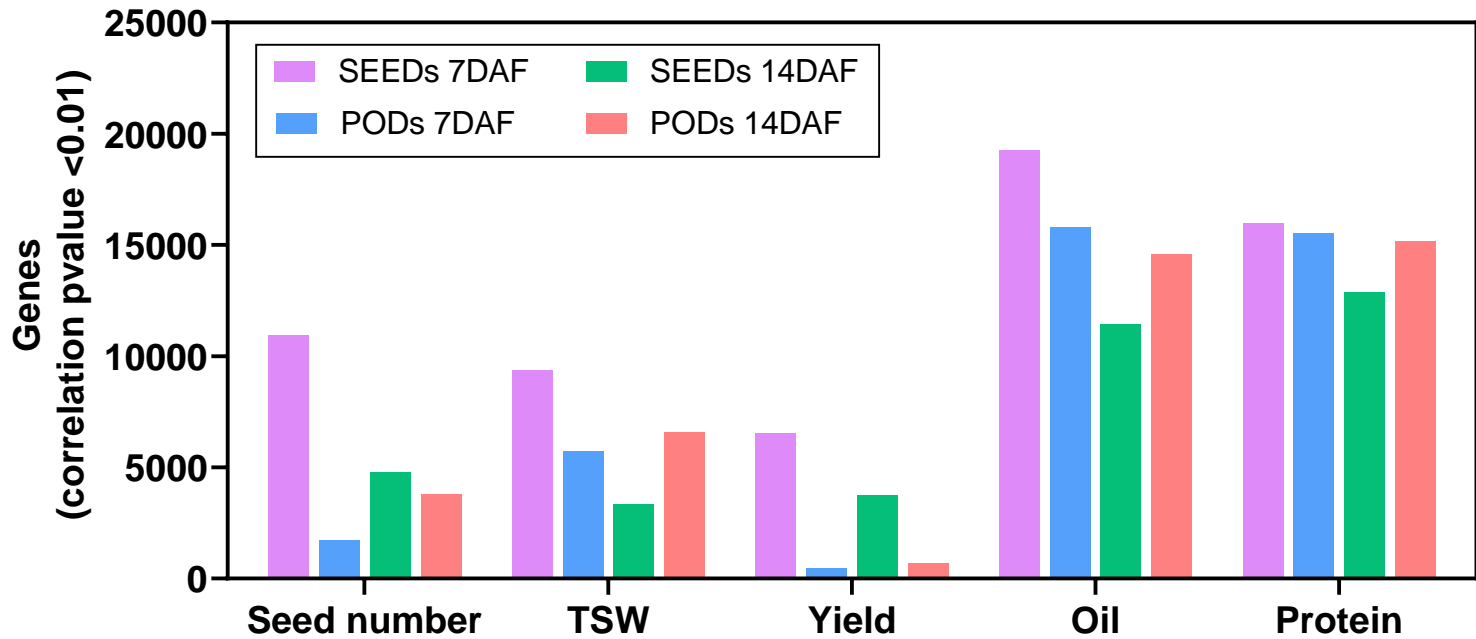

Supplement: Supplementary file 1 [file supplementary]

**A**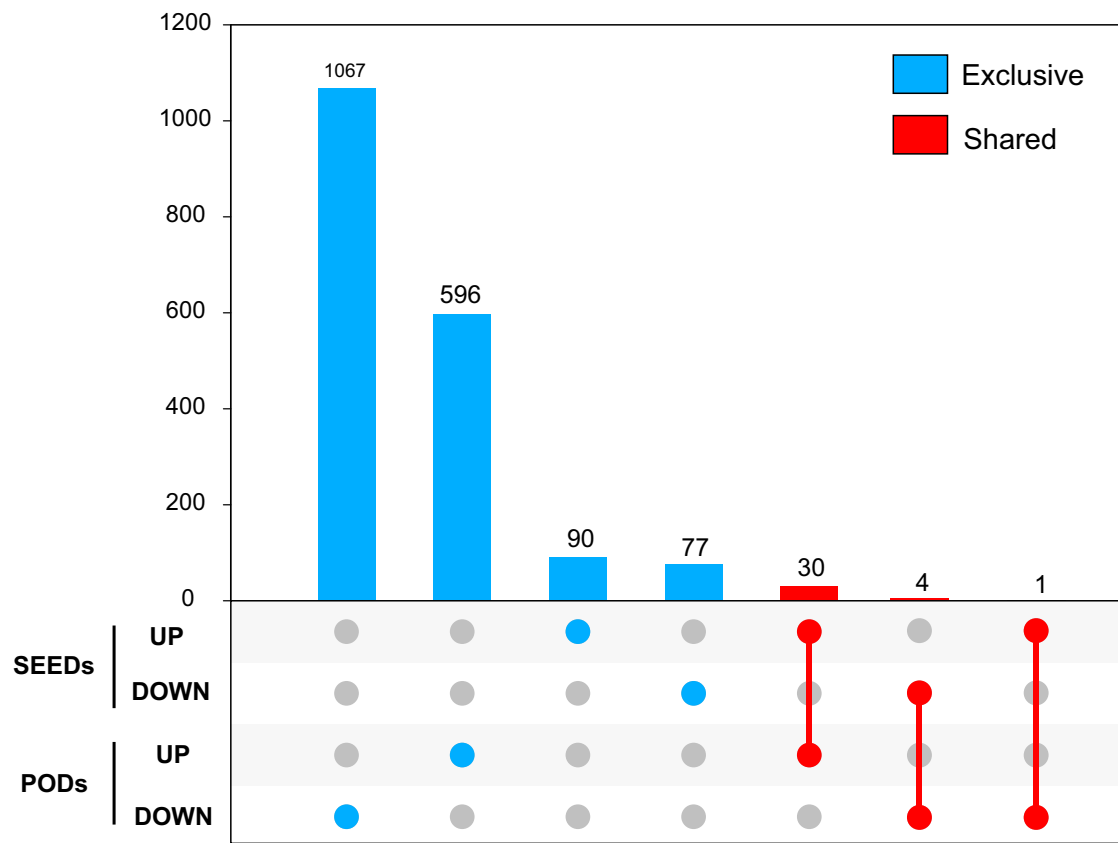**B**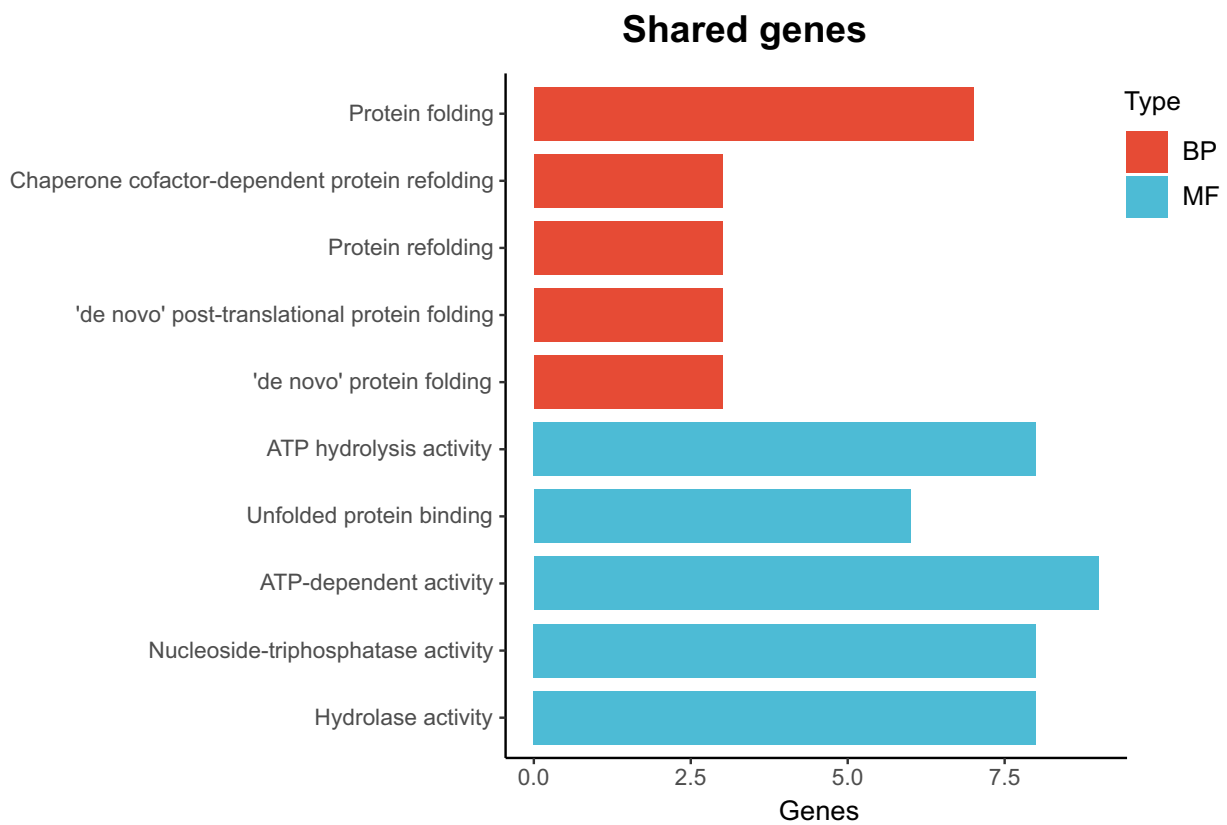

Supplement: Supplementary file 2 [file supplementary]
